# Supplementary material
Source: publisher site journal article supplement (https://www.dovepress.com/article/429402)
Supplement: Supplementary file 1 [file get_supplementary_file.php]

**Supplementary table 1. Patient characteristics of primary AML patient samples.**

| Patient | Age | Gender | Disease status  | Cytogenetics        | Bone marrow Blasts (%) | Gene mutation         |
|---------|-----|--------|-----------------|---------------------|------------------------|-----------------------|
| 1       | 67  | Male   | Relapsed        | 46,XY               | 32.9                   | NPM1                  |
| 2       | 71  | Male   | Relapsed        | 46,XY               | 35                     | NPM1,FLT3             |
| 3       | 47  | Female | Relapsed        | NA                  | 42                     | PML-RARA              |
| 4       | 70  | Male   | Relapsed        | 46,XY               | 57.5                   | WT1                   |
| 5       | 54  | Male   | Relapsed        | 46,XY               | 45                     | PML-RARA              |
| 6       | 68  | Male   | Relapsed        | 46,XY               | 37                     | WT1                   |
| 7       | 48  | Male   | Newly diagnosed | 46,XY,inv16(p13q22) | 39                     | CBFB-MYH11            |
| 8       | 65  | Female | Newly diagnosed | NA                  | 36                     | CSF3R, DNMT3A, NOTCH1 |
| 9       | 61  | Male   | Newly diagnosed | 46,XY               | 92                     | WT1                   |
| 10      | 59  | Female | Newly diagnosed | 50,XX,+4,+8         | 10.7                   | NA                    |
| 11      | 80  | Male   | Newly diagnosed | NA                  | 41.1                   | WT1                   |
| 12      | 46  | Male   | Newly diagnosed | 46,XY               | 34.9                   | WT1                   |

**Supplementary table 1. Patient characteristics of primary AML patient samples.**

| Patient | Age | Gender | Disease status  | Cytogenetics   | Bone marrow Blasts(%) | Gene mutation |
|---------|-----|--------|-----------------|----------------|-----------------------|---------------|
| 13      | 68  | Male   | Newly diagnosed | 46,XY          | 32                    | WT1           |
| 14      | 41  | Male   | Newly diagnosed | 46,XY          | 30                    | WT1           |
| 15      | 58  | Male   | Newly diagnosed | 46,XY          | 43                    | CBFB-MYH11    |
| 16      | 71  | Male   | Newly diagnosed | 46,XY          | 57                    | WT1           |
| 17      | 83  | Female | Newly diagnosed | NA             | 47                    | WT1           |
| 18      | 67  | Female | Newly diagnosed | 46,XX          | 87.5                  | NPM1,FLT3     |
| 19      | 42  | Femlae | Newly diagnosed | 46,XX,t(11,17) | 93.5                  | WT1           |
| 20      | 87  | Female | Newly diagnosed | NA             | 54                    | WT1           |

NA: not available

**Supplementary formula 1**

***NK cell cytotoxicity***(%) =

$$100 \times \frac{(\% \text{Annxin V positive target cells pretreated with VEN or SEL in coculture with NK cells} - \% \text{Annxin V positive target cells in cell death with VEN or SEL pretreated})}{(100 - \% \text{Annxin V positive target cells in cell death with VEN or SEL pretreated})}$$

## Supplementary figure 1

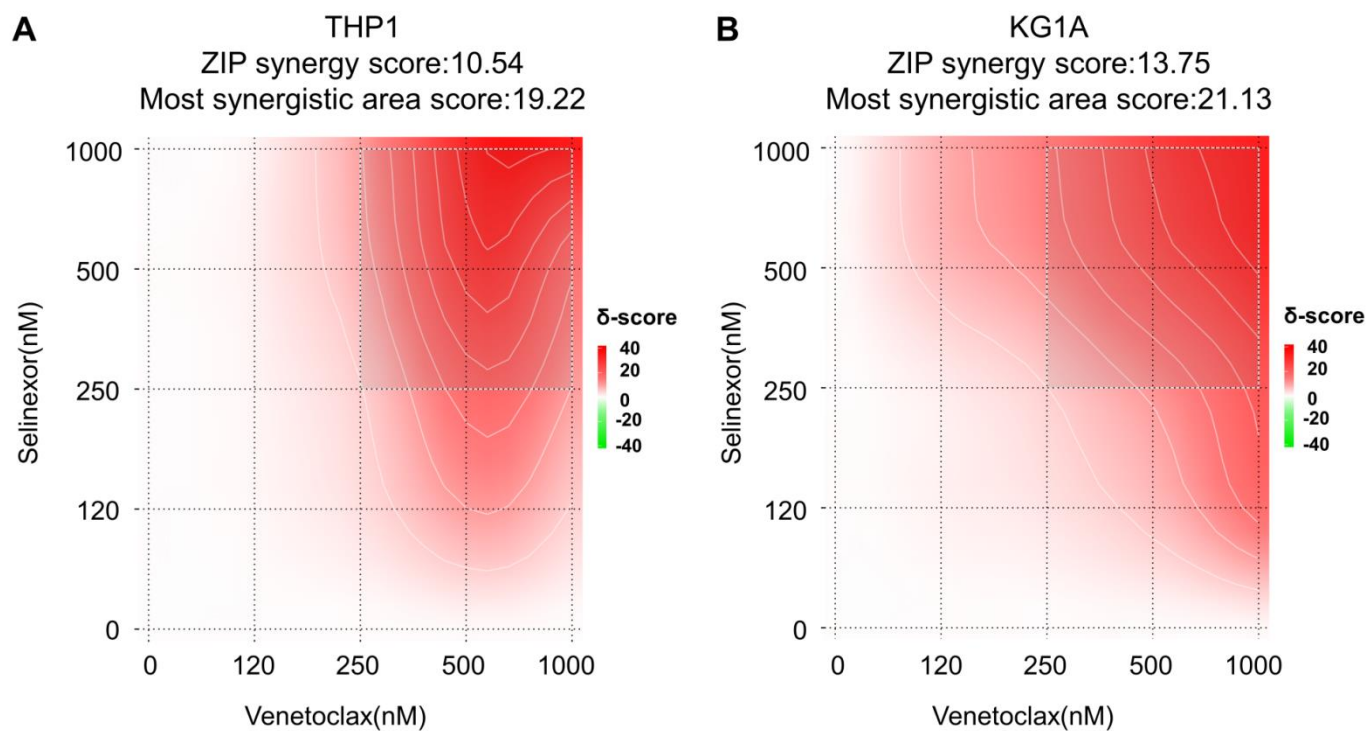

### Supplementary figure 1 Selinexor synergistically enhances the cytotoxicity of venetoclax against AML cells.

Heatmaps of drug combination responses. Selinexor and venetoclax acted synergistically on THP-1 (A) and KG-1A (B) cells. Selinexor and venetoclax at the indicated concentrations were applied to treat cells for 24 h, and inhibition was assessed by apoptosis assays. ZIP synergy scores were calculated using SynergyFinder software.

Supplementary figure 2

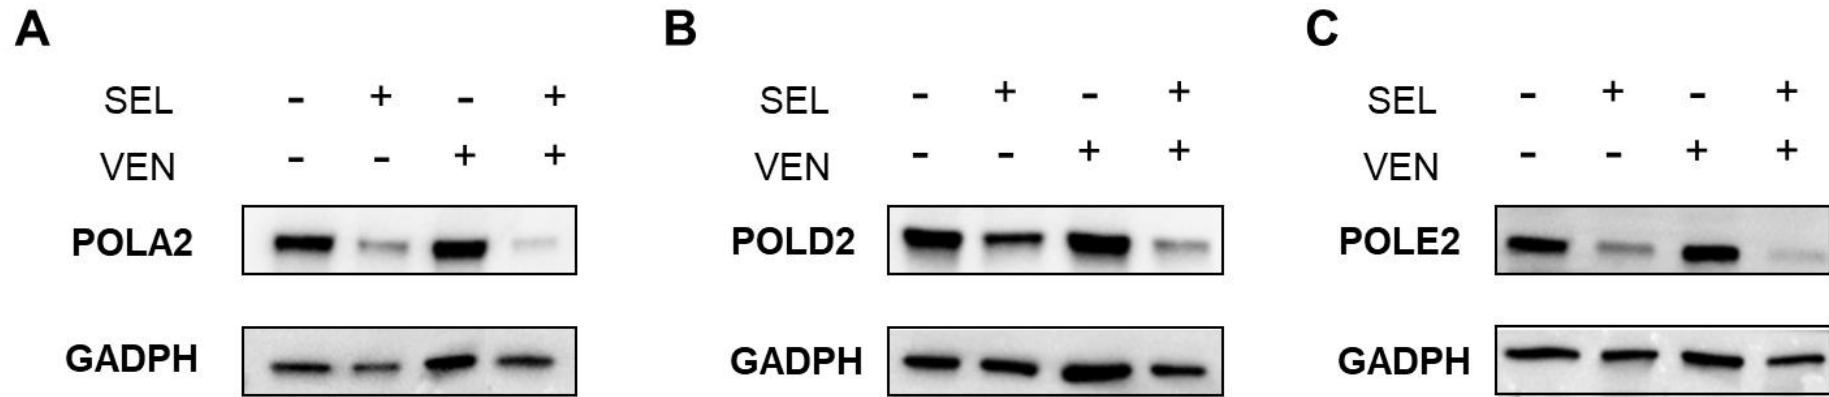

**Supplementary figure 2** The protein levels of DNA replication proteins POLA2(A), POLD2(B) and POLE2(C) were determined by western blot. DNA replication-related proteins of THP1 are downregulated with selinexor and venetoclax cotreatment.
